# Supplementary material for: Regulation of asymmetric positioning of nuclei by Wnt and Src signaling and its roles in POP-1/TCF nuclear asymmetry in Caenorhabditis elegans
Source: PubMed Central journal article supplement (PMC2855865; doi:10.1111/j.1365-2443.2010.01388.x), 2010-04
Supplement: gtc0015-0397-SD1.pdf [file gtc0015-0397-SD1.pdf]

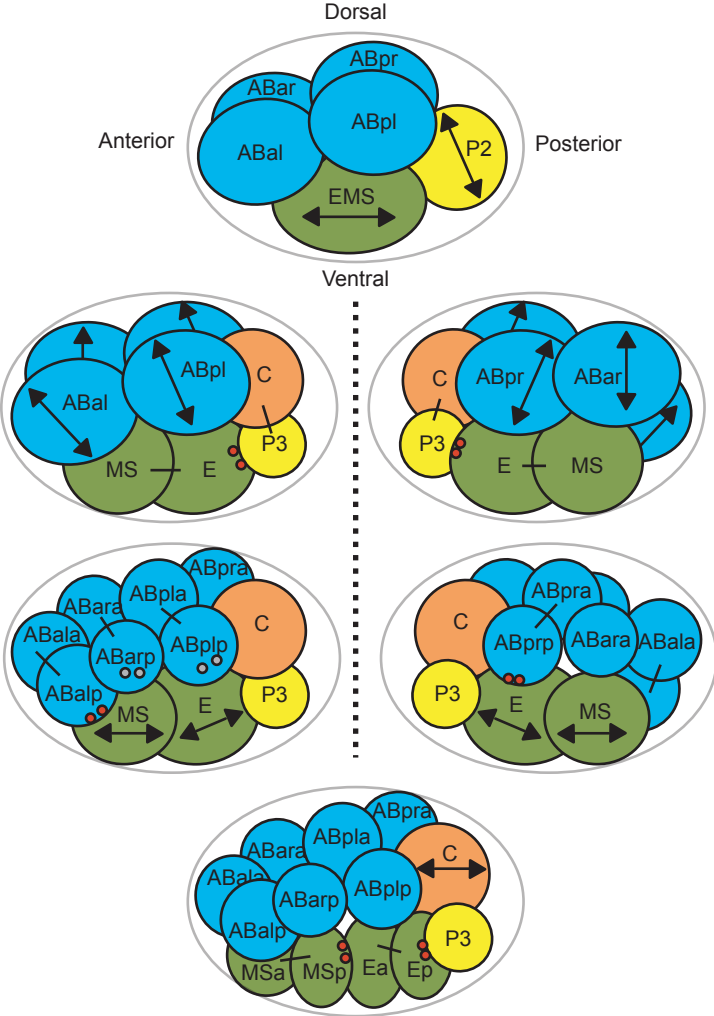

**Figure S1**
